# Supplementary material
Source: PubMed Central journal article supplement (PMC5612844)
Supplement: NIHMS888036-supplement-supplement_1.pdf [file NIHMS888036-supplement-supplement_1.pdf]

Supplemental Table I. Endovascular vs Open Preoperative Variables for Unmatched Entire Cohort

| <b>Parameter</b>                                   | <b>Endovascular</b> | <b>Open</b>  | <b>p-value</b> |
|----------------------------------------------------|---------------------|--------------|----------------|
| Patients                                           | 2935 (36.4%)        | 5131 (63.6%) |                |
| Age                                                | 70 ± 12             | 68 ± 11      | <0.0001        |
| Sex (male)                                         | 1656 (56.4%)        | 3182 (62.0%) | <0.0001        |
| Race (white)                                       | 2287 (78.3%)        | 3970 (77.4%) | 0.015          |
| Transfer Status                                    | 409 (14.0%)         | 614 (12.0%)  | 0.029          |
| Inpatient Admission                                | 1971 (67.2%)        | 5097 (99.3%) | <0.0001        |
| ASA >2                                             | 2152 (73.3%)        | 4944 (96.4%) | <0.0001        |
| Preoperative Antiplatelet Therapy                  | 2406 (82.0%)        | 4107 (80.0%) | <0.0001        |
| Preoperative Statin Therapy                        | 1981 (67.5%)        | 3557 (69.3%) | <0.0001        |
| Steroid Use                                        | 229 (7.8%)          | 277 (5.4%)   | <0.0001        |
| Bleeding Disorder                                  | 947 (32.3%)         | 1256 (24.3%) | <0.0001        |
| Ascites                                            | 3 (0.1%)            | 8 (0.2%)     | 0.809          |
| Congestive Heart Failure                           | 134 (4.6%)          | 176 (3.6%)   | 0.002          |
| Chronic Obstructive Pulmonary Disease              | 293 (10.0%)         | 661 (12.9%)  | 0.0003         |
| Hypertension Medication                            | 2525 (86.0%)        | 4313 (84.1%) | 0.001          |
| Tobacco Use                                        | 777 (26.5%)         | 2044 (39.9%) | <0.0001        |
| Dialysis                                           | 426 (14.5%)         | 403 (7.9%)   | <0.0001        |
| Insulin Dependent Diabetes                         | 1278 (43.5%)        | 1630 (31.7%) | <0.0001        |
| Dependent Functional Status                        | 457 (15.6%)         | 469 (9.1%)   | <0.0001        |
| Tissue Loss                                        | 1960 (66.8%)        | 2987 (58.2%) | <0.0001        |
| Infrageniculate Revascularization                  | 832 (28.4%)         | 2372 (46.2%) | <0.0001        |
| Prior Bypass of Current Segment                    | 461 (15.7%)         | 1145 (22.3%) | <0.0001        |
| Prior Percutaneous Intervention of Current Segment | 683 (23.3%)         | 884 (17.2%)  | <0.0001        |
